# Supplementary material
Source: PubMed Central journal article supplement (PMC5951393)
Supplement: NIHMS955018-supplement-005598_graphic_abstract.pdf [file NIHMS955018-supplement-005598_graphic_abstract.pdf]

Changes in left atrial structure and mechanical function

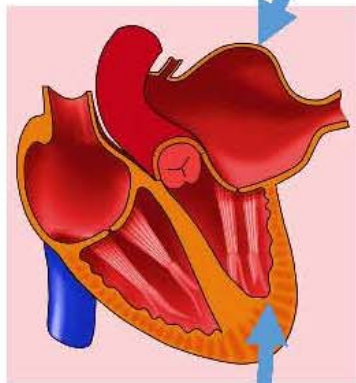

Left ventricular remodeling occurring concurrently with left atrial structural & mechanical changes

**10 months  
of high  
intensity  
endurance  
training**

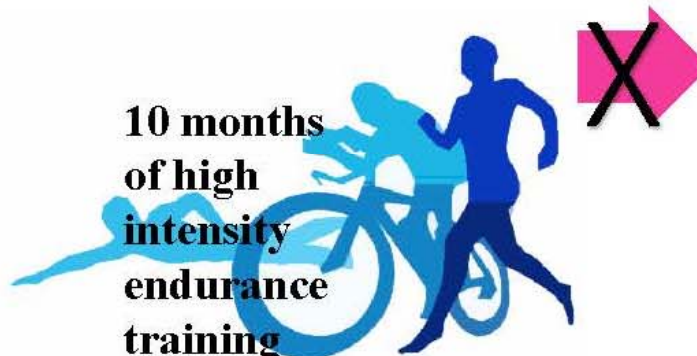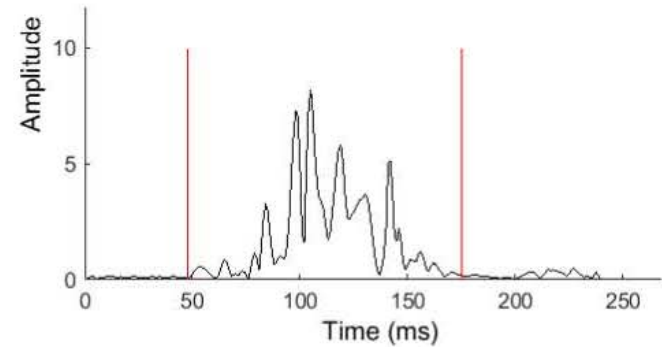

No significant changes in left atrial electrophysiological function that could be associated with atrial fibrillation

Dose of endurance exercise training that leads to atrial fibrillation is unknown
